# Supplementary material for: Diatomic-doped carbon layer decorated Na3V2(PO4)2F3as a durable ultrahigh-stability cathode for sodium ion batteries
Source: Royal Society of Chemistry journal article supplement (doi:10.1039/d3nj00808h), 2023-01-01
Supplement: d3nj00808h1.pdf [file d3nj00808h1.pdf]

## Supporting Information

### Diatomic-doped carbon layers decorated $\text{Na}_3\text{V}_2(\text{PO}_4)_2\text{F}_3$ as a durable ultrahigh-stability cathode for sodium ion batteries

Xuntao Zhang,<sup>[a]</sup> Hualing Tian,<sup>[a]</sup> Yanhui Zhang,<sup>[a]</sup> Yanjun Cai,<sup>[a]</sup> Xiang Yao\*<sup>[a]</sup>, Zhi Su\*\*<sup>[a,b]</sup>

[a] X. Zhang, H. Tian, Y. Zhang, Prof. Y. Cai, Prof. X. Yao, Prof. Z. Su

College of Chemistry and Chemical Engineering, Xinjiang Key Laboratory of Energy Storage and Photoelectrolytic Materials, Xinjiang Normal University, Urumqi, 830054, Xinjiang, P.R. China

E-mail: yaoxiangxjnu@163.com; suzhixj@163.com

[b] Prof. Z. Su

Xinjiang Institute of Technology, 1 Xuefu Road, Akesu, 843100, Xinjiang, P.R. China

E-mail: suzhixj@163.com

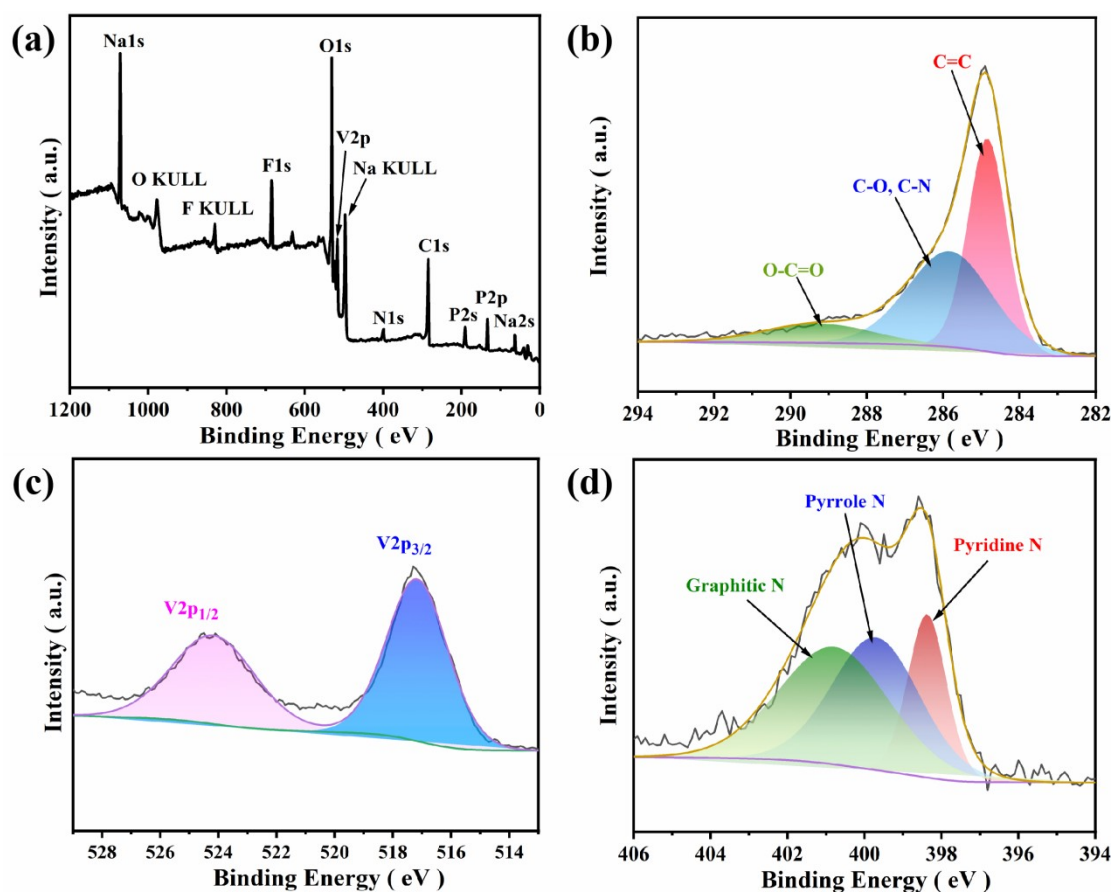

Fig. S1 XPS photoelectron spectra of NVPF@NC: the spectrum of (a) full XPS, (b) C 1s, (c) V 2p and (d) N 1s.

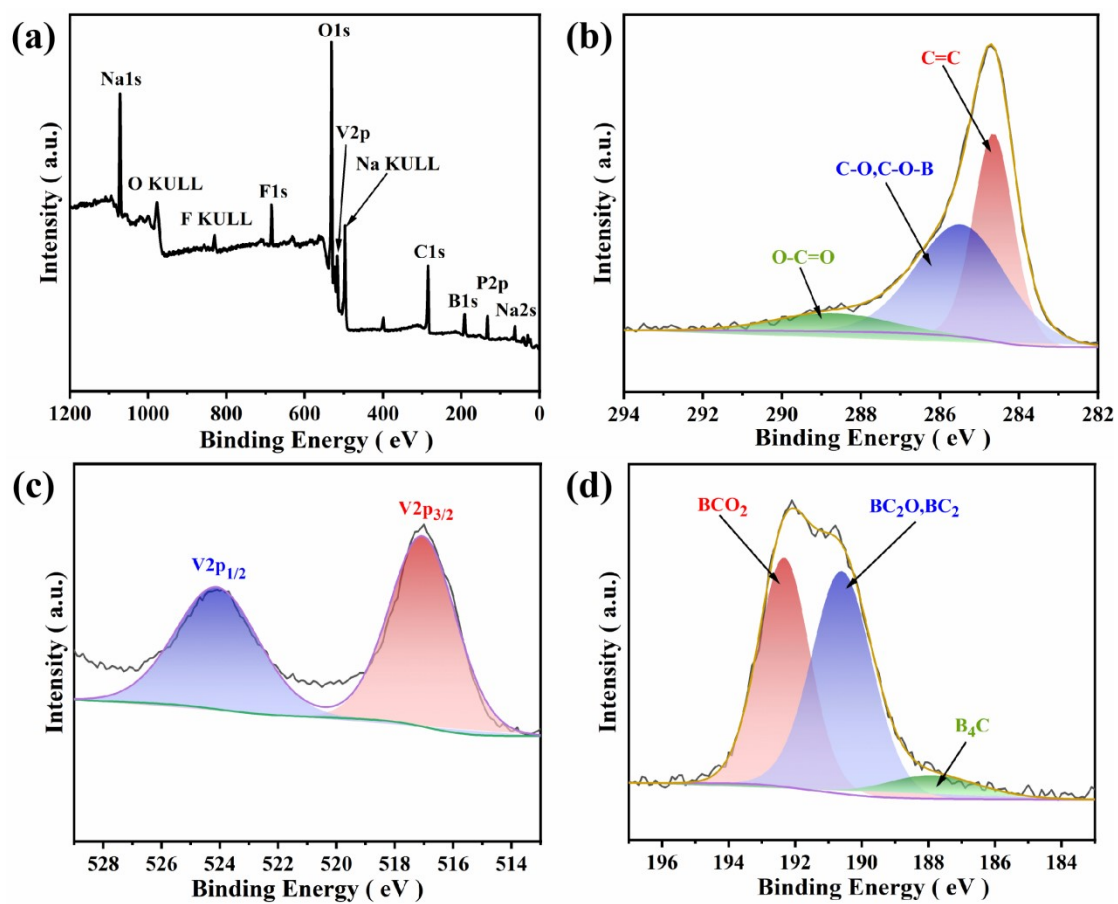

Fig. S2 XPS photoelectron spectra of NVPF@BC: the spectrum of (a) full XPS, (b) C 1s, (c) V 2p and (d) B 1s.

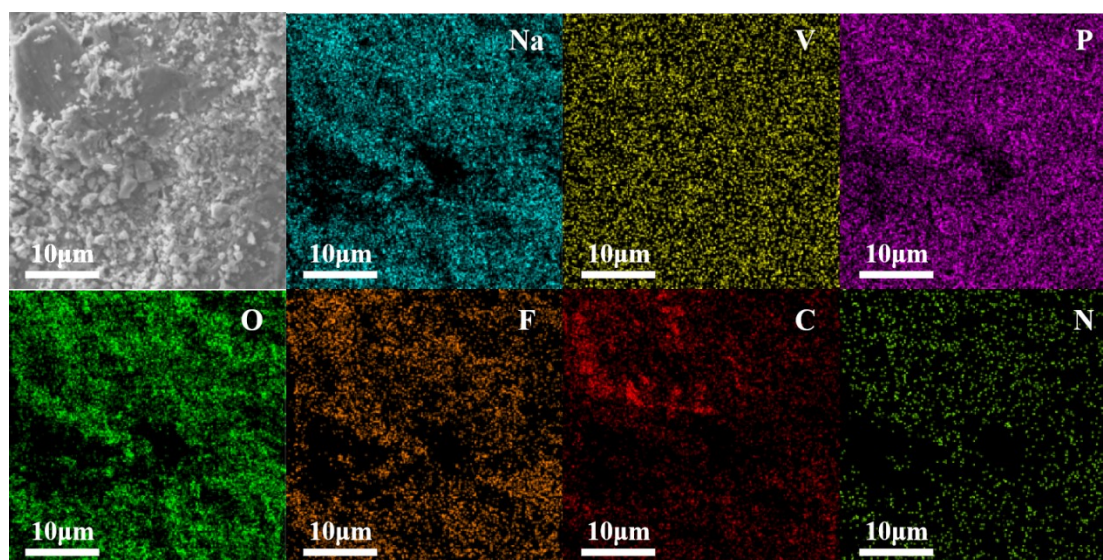

Fig. S3 EDS mapping images of NVPF@NC composite.

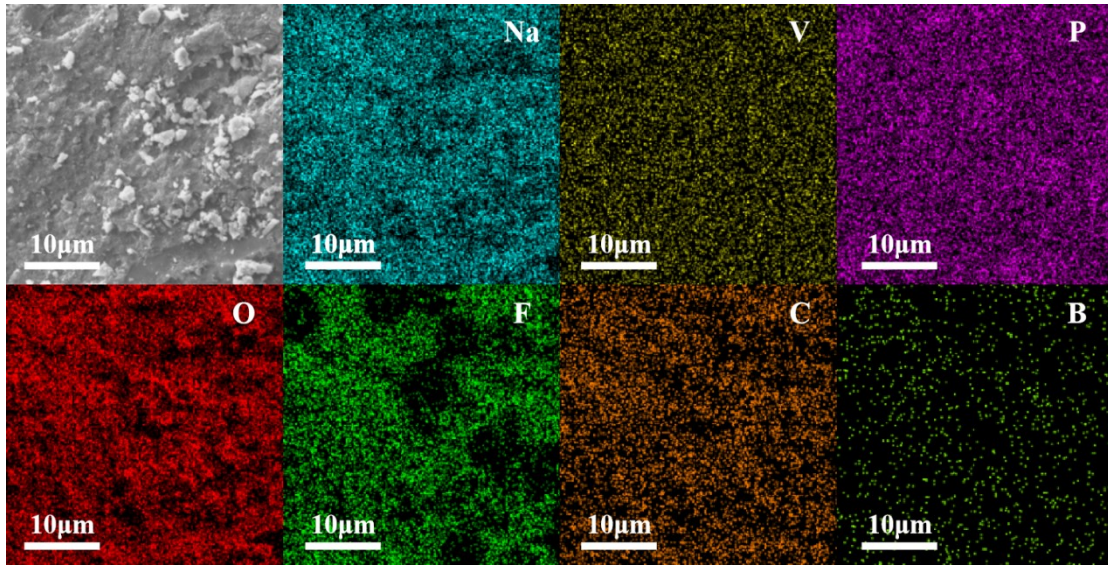

Fig. S4 EDS mapping images of NVPF@BC composite.

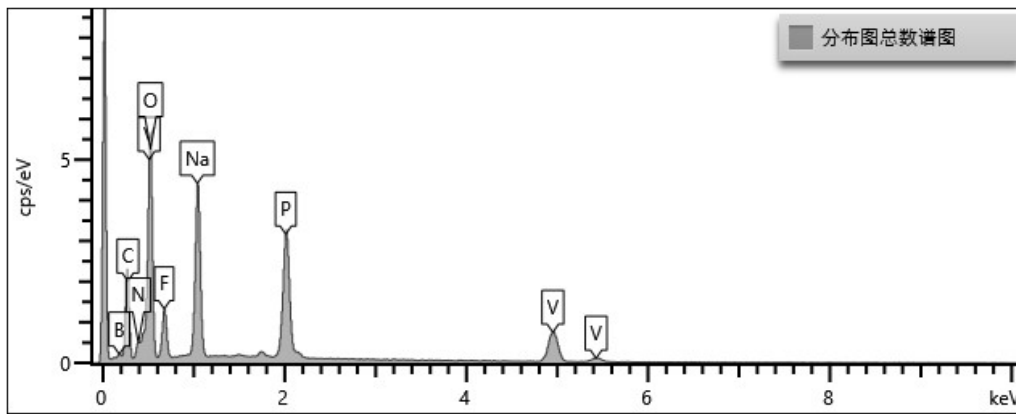

Fig. S5 Total number spectrum of distribution diagram of each atom in NVPF@NBC.

Table. S1 Mass fraction table of each atom in NVPF@NBC.

| Elements  | B    | C     | N    | O     | F    | Na    | P     | V     | Total mass |
|-----------|------|-------|------|-------|------|-------|-------|-------|------------|
| wt%       | 2.21 | 15.68 | 2.42 | 27.38 | 6.98 | 11.13 | 11.39 | 22.81 | 100        |
| Wt% sigma | 0.64 | 0.26  | 0.26 | 0.34  | 0.15 | 0.13  | 0.14  | 0.33  | 1          |

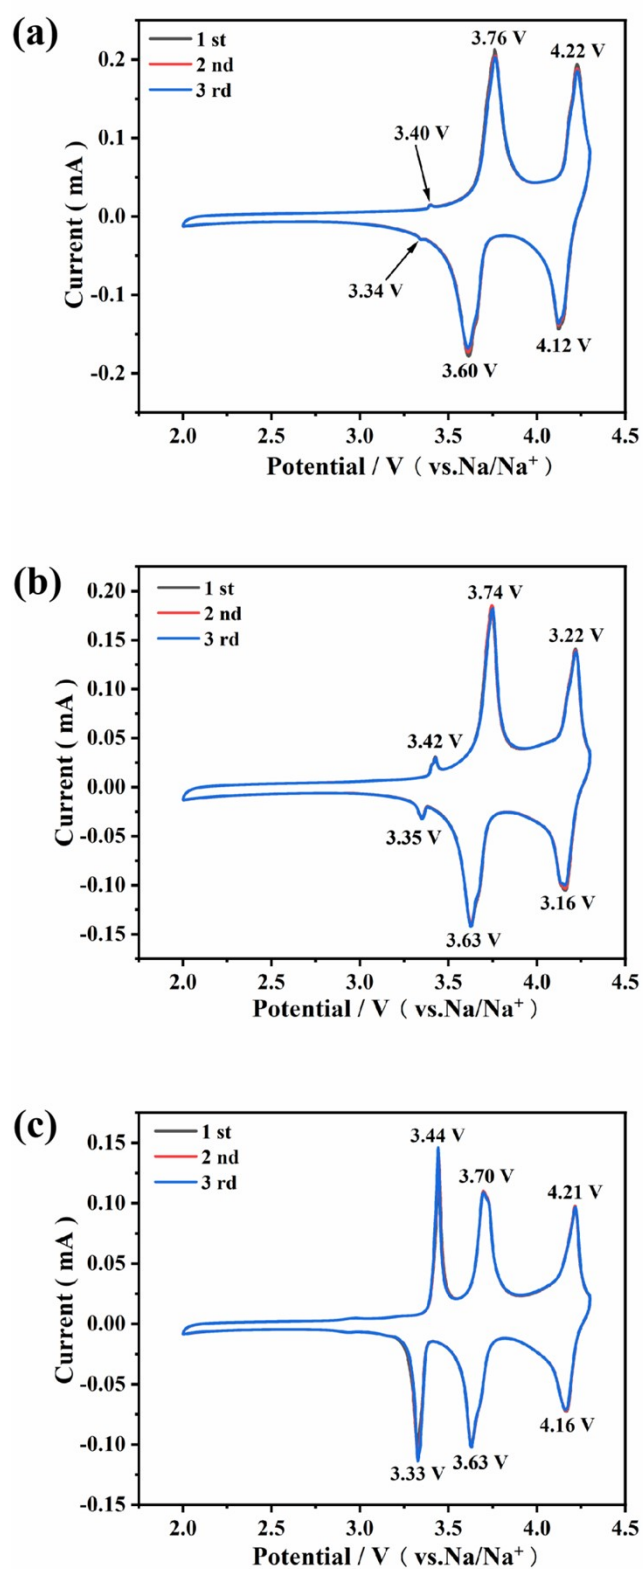

Fig. S6 CV curves of the four cycles of (a) NVPF, (b) NVPF@NC and (c) NVPF@BC at 0.5 mV s<sup>-1</sup> between 2.0 and 4.3 V

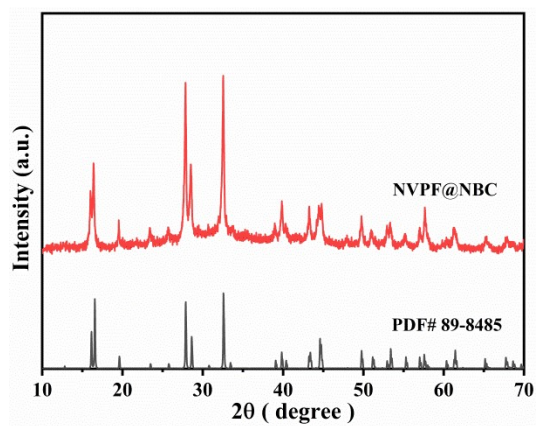

Fig. S7 XRD pattern of the NVPF@NBC electrode after 100 cycles at 0.2 C.

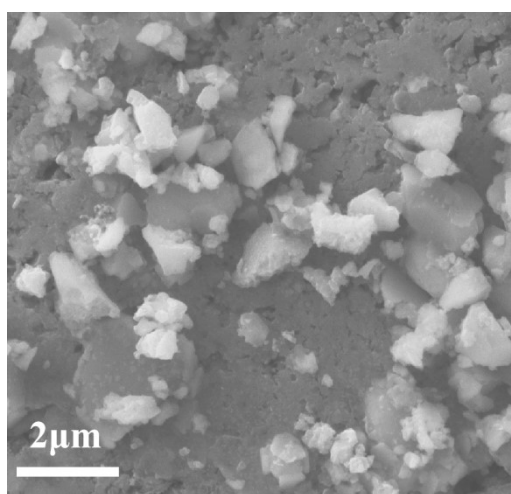

Fig. S8 SEM image of the NVPF@NBC electrode after 100 cycles at 0.2C.

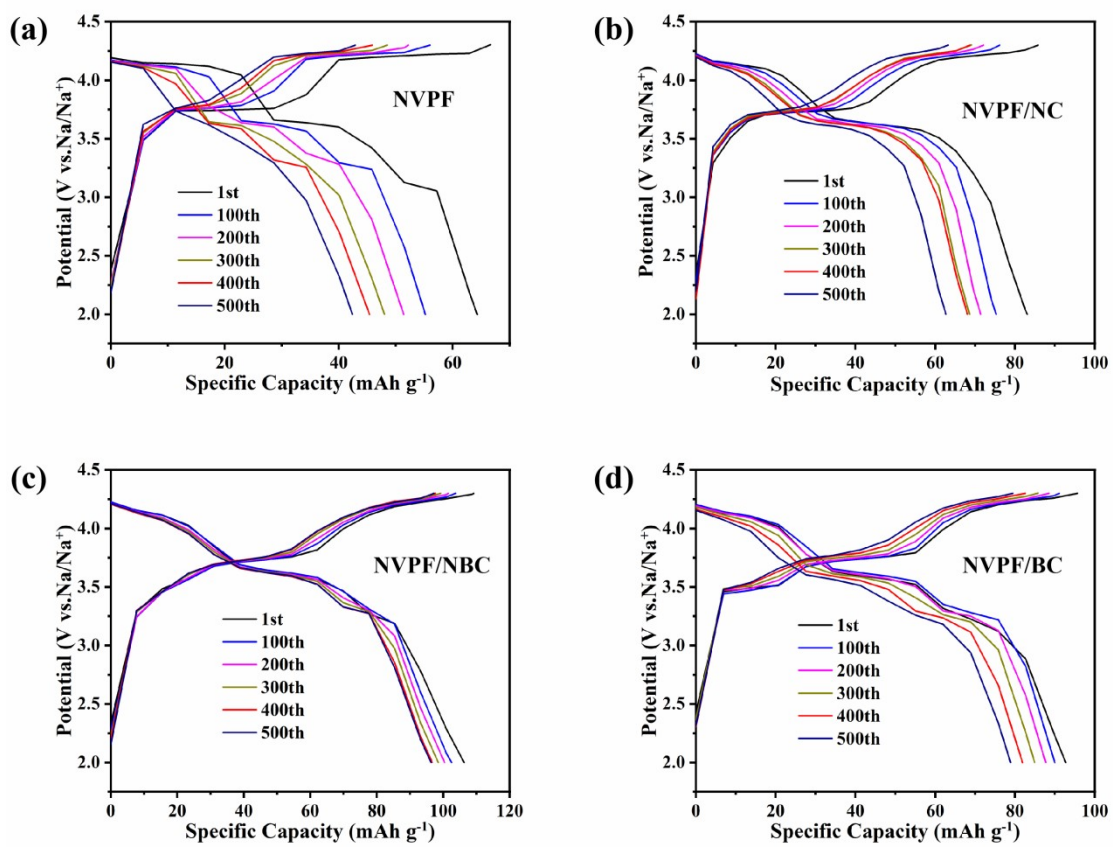

Fig. S9 Charge discharge curves of (a) NVPF (b) NVPF@NC (c) NVPF@NBC (d) NVPF@BC at different cycle periods at 5C.

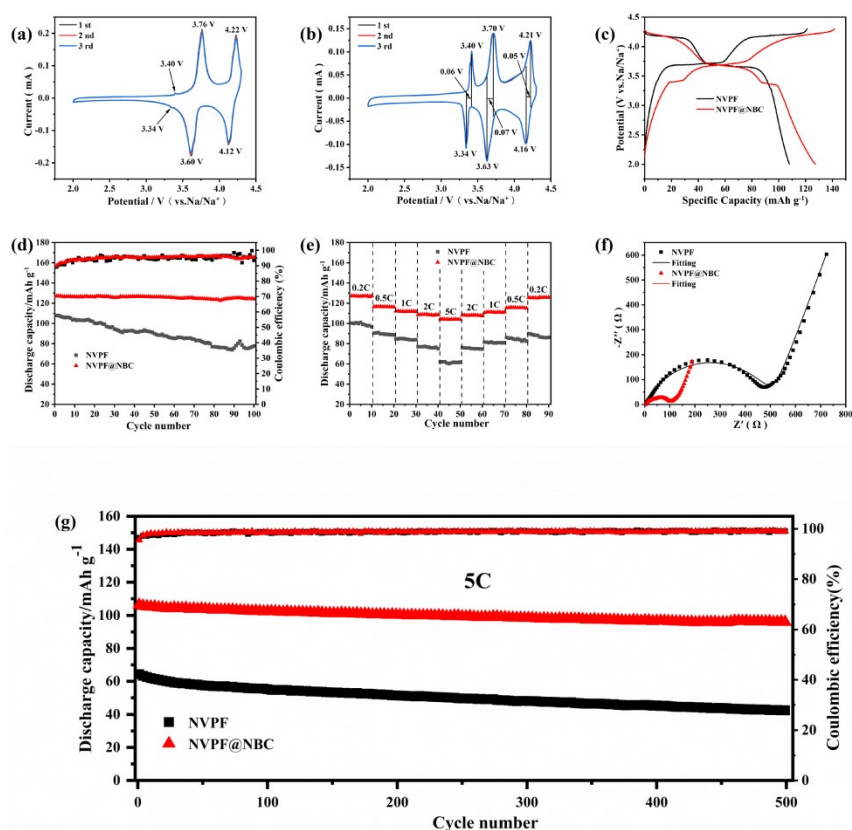

Fig. S10 Cyclic voltammety (a) of NVPF, (b) of NVPF@NBC, (c) first charge and discharge curves of NVPF and NVPF@NBC, (d) cyclic performance diagram of NVPF and NVPF@NBC at 0.2C, (e) rate performance of NVPF and NVPF@NBC at different rates, (f) AC impedance plots of NVPF and NVPF@NBC (g) cycling performance of NVPF and NVPF@NBC at 5 C.

Table. S2 Comparison of rate capability of NVPF@NBC in this work with polyanionic compounds of others reported in the literatures.

| Sample                                                                           | Low-rate Capacity (mA h g <sup>-1</sup> ) | High-rate Capacity (mA h g <sup>-1</sup> ) | Capacity retention ratio (%) | Voltage Window (V) | References |
|----------------------------------------------------------------------------------|-------------------------------------------|--------------------------------------------|------------------------------|--------------------|------------|
| NVPF@C-4                                                                         | 121.5 (0.1C)                              | 99.2 (10C)                                 | (1000cycles, 90.1% at 10C)   | 2.5-4.5            | 1          |
| Na <sub>3</sub> V <sub>2</sub> (PO <sub>4</sub> ) <sub>2</sub> F <sub>3</sub> /C | 106.4 (0.2C)                              | 94.1 (5C)                                  | (500cycles, 92.4% at 1C)     | 2.5-4.2            | 2          |
| NVPF-H@cPAN                                                                      | 116.2 (0.2C)                              | 84.4 (5C)                                  | (2000cycles, 85% at 5C)      | 2.0-4.5            | 3          |

|                                                                                   |                 |            |                                  |         |           |
|-----------------------------------------------------------------------------------|-----------------|------------|----------------------------------|---------|-----------|
| <b>NVPF-Zr-0.02/NC</b>                                                            | 119.2<br>(0.5C) | 98.1 (20C) | (1000cycles,<br>90.2% at<br>20C) | 2.0-4.5 | 4         |
| <b>NVPF@C</b>                                                                     | 109.5<br>(0.1C) | 78.9 (30C) | (1000cycles,<br>87.8% at<br>20C) | 2.0-4.3 | 5         |
| <b>BG-Na<sub>3</sub>V<sub>2</sub>(PO<sub>4</sub>)<sub>3</sub>@C</b>               | 111.6<br>(0.1C) | 94.7 (10C) | (100cycles,<br>96.4% at<br>10C)  | 2.5-3.8 | 6         |
| <b>NVPF/C-PDPA</b>                                                                | 113.8<br>(0.5C) | 98.0 (10C) | (800cycles,<br>95.8% at<br>10C)  | 3.0-4.6 | 7         |
| <b>Na<sub>3</sub>V<sub>2</sub>(PO<sub>4</sub>)<sub>3</sub>/C+B</b>                | 95.8<br>(0.2C)  | 90.3 (5C)  | (40cycles,<br>98.3% at<br>0.2C)  | 2.7-4.0 | 8         |
| <b>Na<sub>3</sub>V<sub>2</sub>(PO<sub>4</sub>)<sub>2</sub>F<sub>3</sub>-SWCNT</b> | 117<br>(0.2C)   | 104.7 (5C) | (100cycles,<br>92.4% at<br>0.2C) | 2.5-4.3 | 9         |
| <b>NVPF@NBC</b>                                                                   | 127.2<br>(0.2C) | 106.3 (5C) | (100cycles,<br>97.6% at<br>0.2C) | 2.5-4.3 | This work |



## References

1. W. X. Zhan, C. L. Fan, W. H. Zhang, G. D. Yi, H. Chen, S. C. Han and J. S. Liu, *International Journal of Energy Research.*, 2020, 8, 6608-6622.
2. F. Hu and X. Jiang, *Inorganic Chemistry Communications.*, 2021, 129, 108653.
3. K. Liang, S. Wang, H. Zhao, X. Huang, Y. Ren, Z. He, J. Mao and J. Zheng, *Chemical Engineering Journal.*, 2022, 428, 131780.
4. C. Guo, J. Yang, Z. Cui, S. Qi, Q. Peng, W. Sun, L.-P. Lv, Y. Xu, Y. Wang and S. Chen, *Journal of Energy Chemistry.*, 2022, 65, 514-523.
5. Y. Li, X. Liang, G. Zhong, C. Wang, S. Wu, K. Xu and C. Yang, *ACS Applied Materials & Interfaces.*, 2020, 23, 25920-25929.
6. Q. Zeng, L. Luo, Z. Yu and L. Jiang, *Solid State Ionics.*, 2018, 323, 92-96.
7. L.-L. Zhang, D. Ma, T. Li, J. Liu, X.-K. Ding, Y.-H. Huang and X.-L. Yang, *ACS Applied Materials & Interfaces.*, 2018, 43, 36851-36859.
8. W. Shen, H. Li, C. Wang, Z. Li, Q. Xu, H. Liu and Y. Wang, *Journal of Materials Chemistry A.*, 2015, 29, 15190-15201.
9. S. Liu, L. Wang, J. Liu, M. Zhou, Q. Nian, Y. Feng, Z. Tao and L. Shao, *Journal of Materials Chemistry A.* 2019, 1, 248-256.
